# Supplementary material
Source: Research Square preprint supplement (doi:10.21203/rs.3.rs-8971723/v1)
Supplement: Supplementary file 1 [file 97d82de0883a41803b853996.docx]

**Table 2: Human decidua sample characteristics**
