# Supplementary material
Source: Research Square preprint supplement (doi:10.21203/rs.3.rs-8971723/v1)
Supplement: Supplementary file 1 [file c37ec8bf7e17ad167b2d0acf.docx]

**Table 1: Human Uterine Sample Characteristics**
