# Supplementary material
Source: Research Square preprint supplement (doi:10.21203/rs.3.rs-8971723/v1)
Supplement: Supplementary file 2 [file b95082134f43108449e9b4af.docx]

**Table 3: Decidual scRNA-seq cluster identifying genes**
