# Supplementary material
Source: Research Square preprint supplement (doi:10.21203/rs.3.rs-8971723/v1)
Supplement: Supplementary file 4 [file d8d759d2a9bf2018cbea8e6a.docx]

**Table 4: Antibody information**
